# Supplementary material for: 4-Acetyl-antroquinonol B Suppresses SOD2-Enhanced Cancer Stem Cell-Like Phenotypes and Chemoresistance of Colorectal Cancer Cells by Inducing hsa-miR-324 Re-Expression
Source: Preprints.org preprint supplement (doi:10.20944/preprints201807.0223.v1), 2018-07-13
Supplement: Supplementary file 1 [file supplementary]

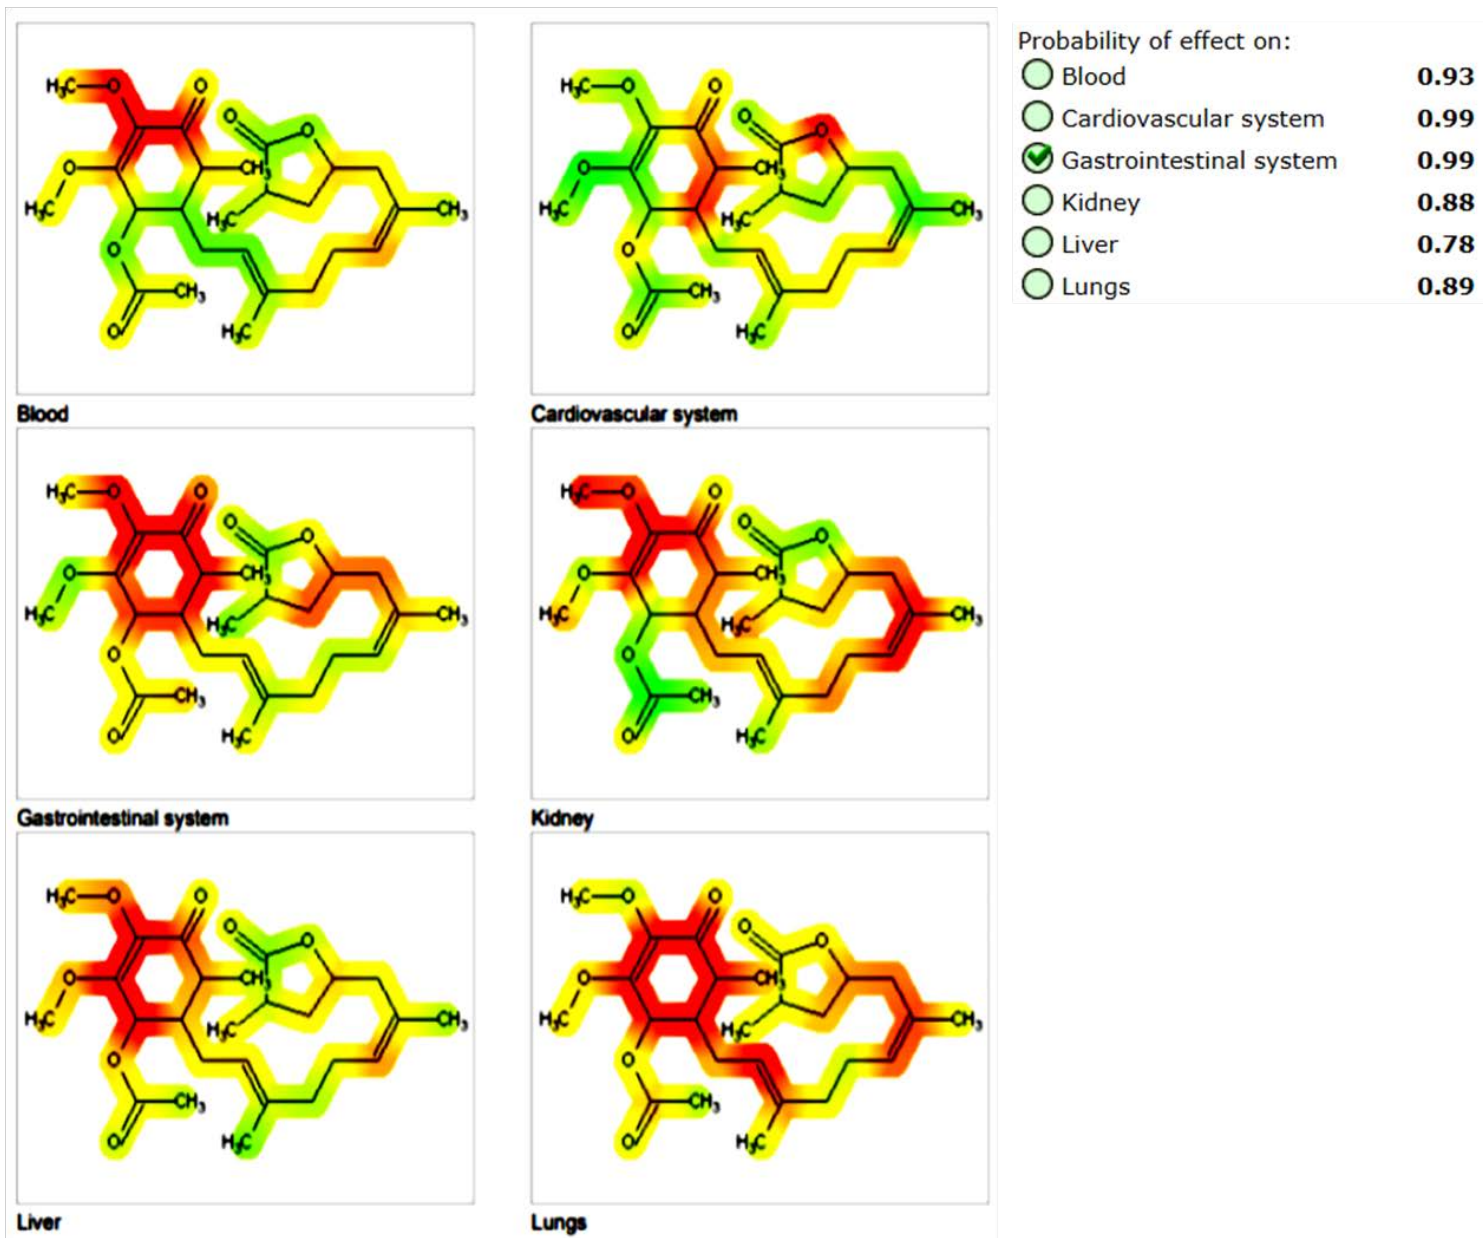

Supplementary Figure 1

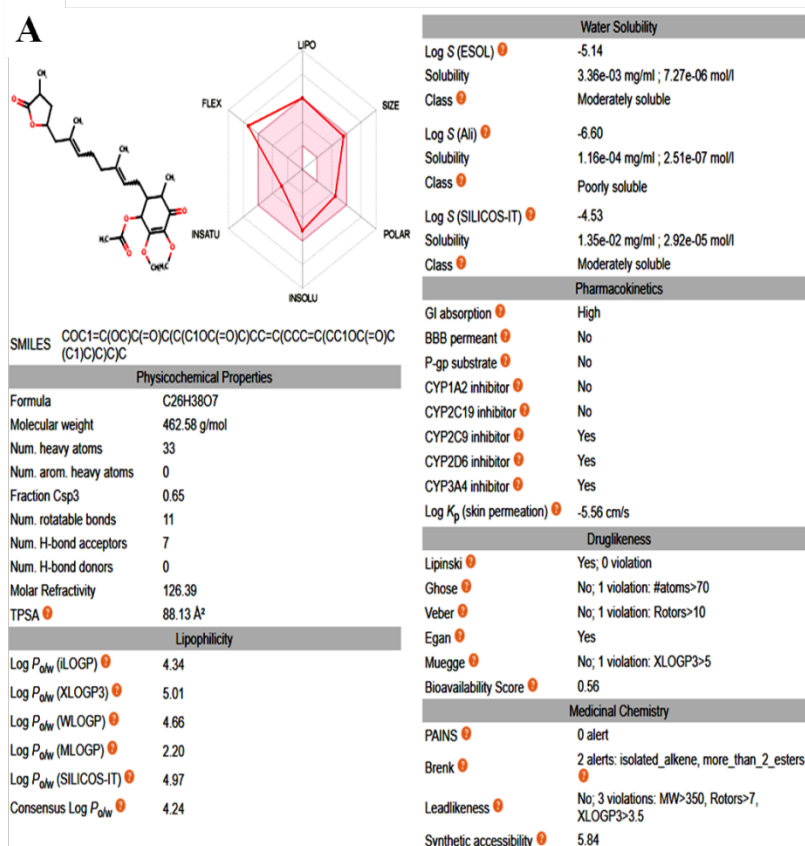

**B**

| Property | Model Name                      | Predicted Value | Unit                       |
|----------|---------------------------------|-----------------|----------------------------|
| Toxicity | AMES toxicity                   | No              | Categorical (Yes/No)       |
| Toxicity | Max. tolerated dose (human)     | 0.092           | Numeric (log mg/kg/day)    |
| Toxicity | hERG I inhibitor                | No              | Categorical (Yes/No)       |
| Toxicity | hERG II inhibitor               | No              | Categorical (Yes/No)       |
| Toxicity | Oral Rat Acute Toxicity (LD50)  | 1.935           | Numeric (mol/kg)           |
| Toxicity | Oral Rat Acute Toxicity (LOAEL) | 0.491           | Numeric (log mg/kg_bw/day) |
| Toxicity | Hepatotoxicity                  | No              | Categorical (Yes/No)       |
| Toxicity | Skin Sensitisation              | No              | Categorical (Yes/No)       |
| Toxicity | <i>T. Pyriformis</i> toxicity   | 0.393           | Numeric (log ug/L)         |
| Toxicity | Minnow toxicity                 | -0.077          | Numeric (log mM)           |

**C**

| Species/Administration route | LD50 (mg/kg) | Reliability (RI)   |
|------------------------------|--------------|--------------------|
| Mouse/Intraperitoneal        | 270          | Borderline(0.39)   |
| Mouse/Oral                   | 3700         | Not Reliable(0.21) |
| Mouse/Intravenous            | 55           | Borderline(0.39)   |
| Mouse/Subcutaneous           | 250          | Not Reliable(0.24) |
| Rat/Intraperitoneal          | 680          | Borderline(0.46)   |
| Rat/Oral                     | 3400         | Not Reliable(0.27) |

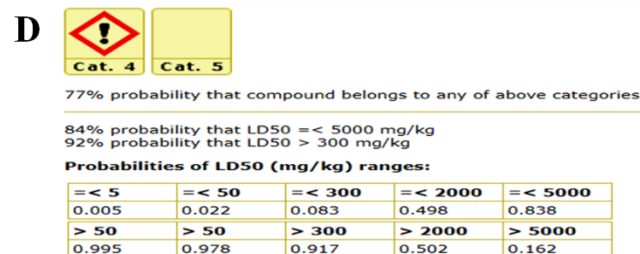

Supplementary Figure 2
